# Supplementary material for: Percolation analysis of the electrical conductive network in a polymer nanocomposite by nanorod functionalization
Source: Royal Society of Chemistry journal article supplement (doi:10.1039/c9ra04680a), 2019-01-01
Supplement: c9ra04680a1.pdf [file c9ra04680a1.pdf]

## Supporting Information

### Percolation analysis of the electrical conductive network in a polymer nanocomposites by nanorod functionalization

Ruibin Ma<sup>1,2</sup>, Guangyao Mu<sup>1,2</sup>, Huan Zhang,<sup>3</sup> Jun Liu,<sup>1,2</sup> Yangyang Gao<sup>1,2\*</sup>, Xiuying Zhao<sup>1,2\*</sup>,

Liqun Zhang<sup>1,2\*</sup>

<sup>1</sup>Key Laboratory of Beijing City on Preparation and Processing of Novel Polymer  
Materials, Beijing University of Chemical Technology, 10029, China

<sup>2</sup> State Key Laboratory of Organic-Inorganic Composites, Beijing University of  
Chemical Technology, 100029, China

<sup>3</sup>Aerospace Research Institute of Materials and Processing Technology, Beijing,  
100076, China

---

\* Corresponding author: [gaoyy@mail.buct.edu.cn](mailto:gaoyy@mail.buct.edu.cn) or [zhaoxy@mail.buct.edu.cn](mailto:zhaoxy@mail.buct.edu.cn) or [zhanglq@mail.buct.edu.cn](mailto:zhanglq@mail.buct.edu.cn)

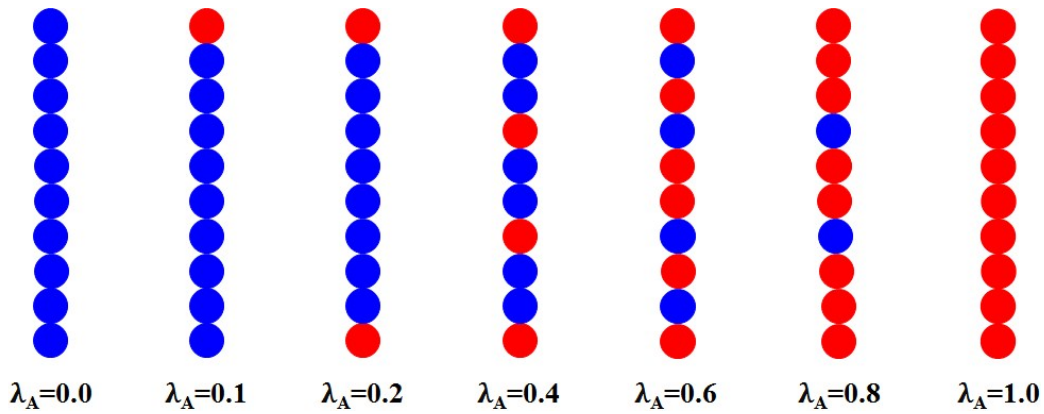

Fig. S1 The distribution of A and B beads in each nanorod (NR) at different NR functionalization degree  $\lambda_A$ . The red spheres denote the A beads and the blue spheres denote the B beads.

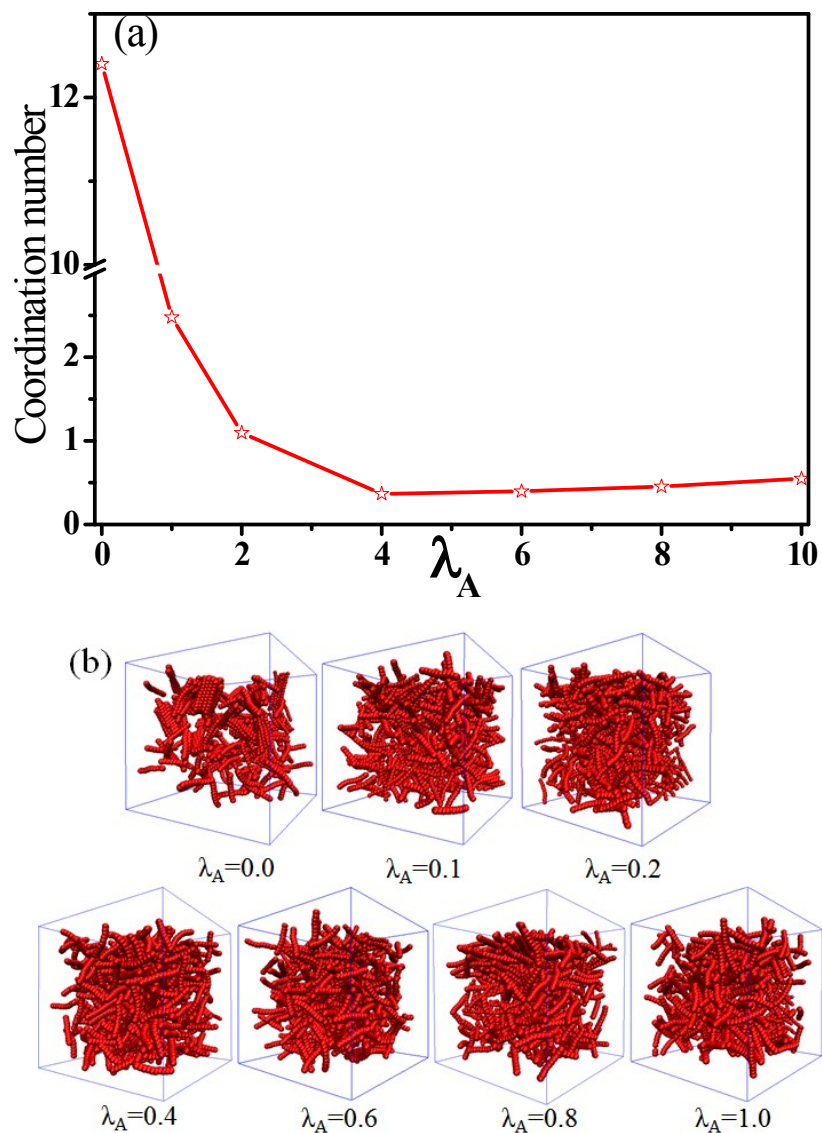

Fig. S2(a) The coordination number and (b) snapshots for different nanorods (NR) functionalization degree  $\lambda_A$  where the polymer chains are neglected for clarity and the red spheres denote the NRs. ( $T^*=1.0$ ,  $\varphi=4.0\%$ )

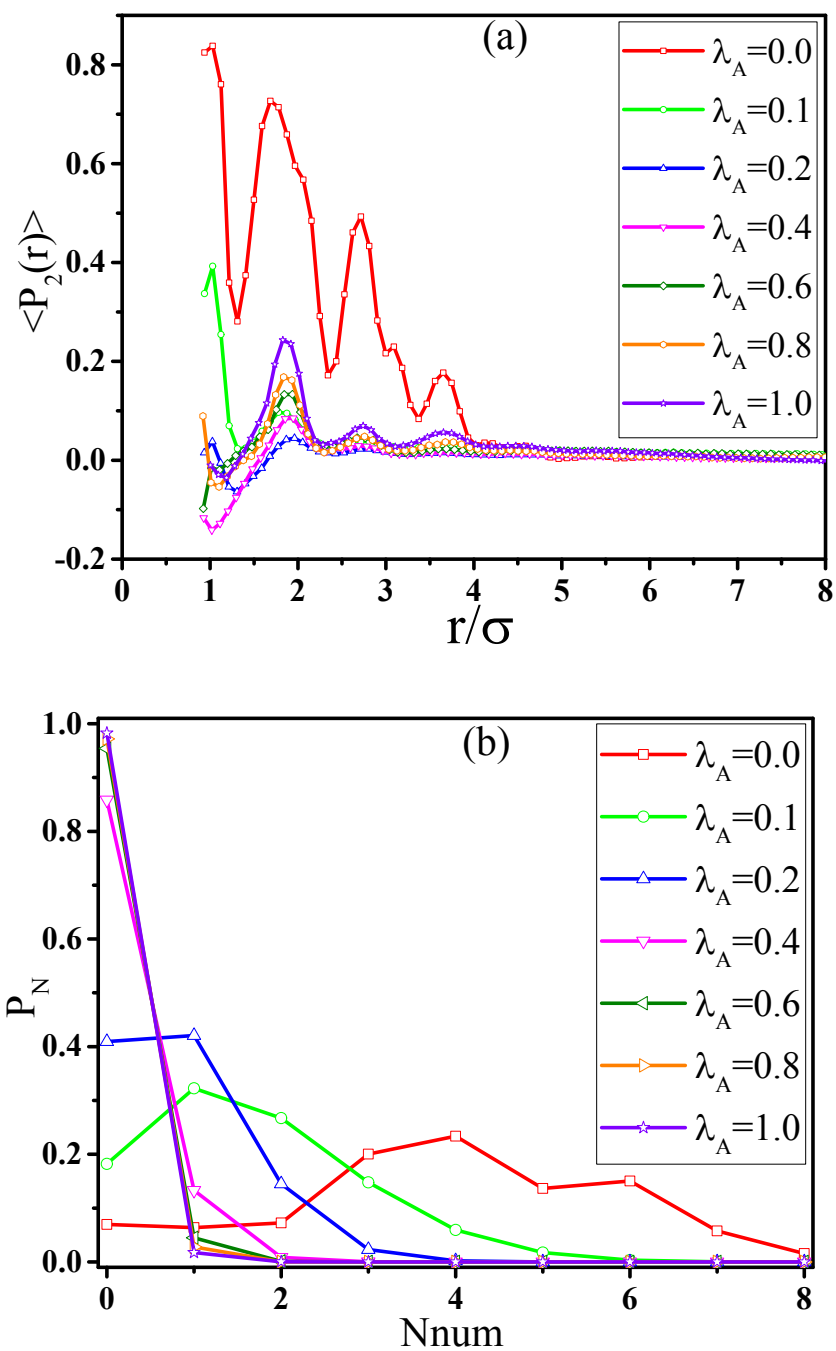

Fig. S3(a) The local order structure  $\langle P_2(r) \rangle$  of the nanorod (NR) aggregation and (b) the probability distribution ( $P_N$ ) of the nearest neighbor NRs surrounding one NR at a separation closer than  $1.5\sigma$  (Nnum) for different NR functionalization degree  $\lambda_A$ . ( $T^* = 1.0$ ,  $\varphi = 4.0\%$ ,  $\dot{\gamma} = 0.0$ )

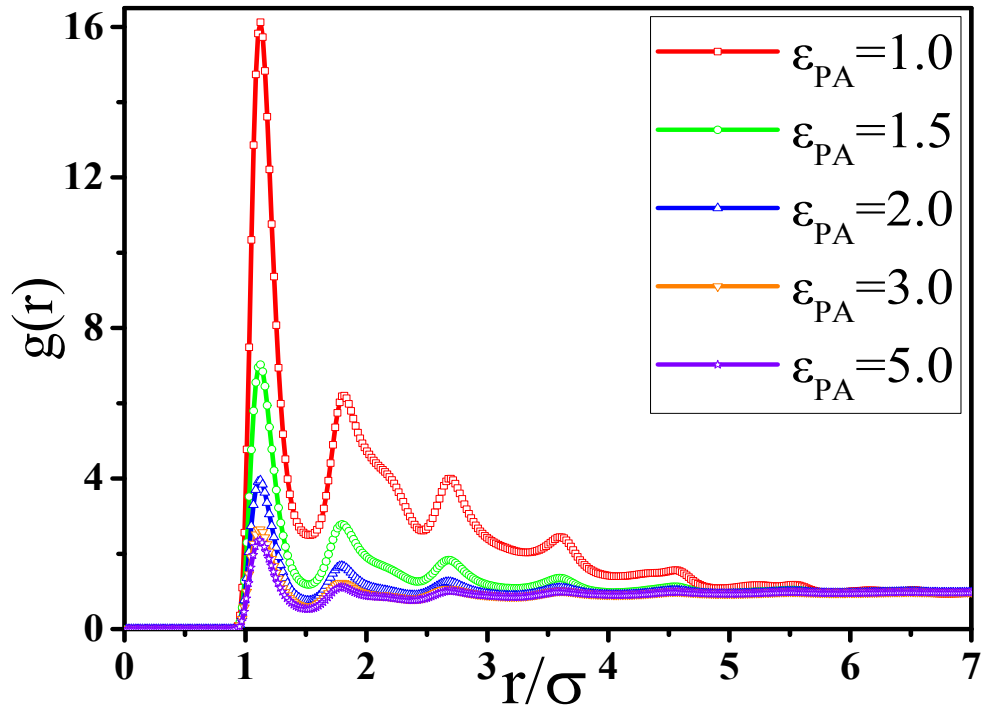

Fig. S4 RDF of nanorods for different interaction  $\epsilon_{pA}$  between polymer and A beads. ( $T^* = 1.0$ ,  $\varphi = 4.0\%$ )

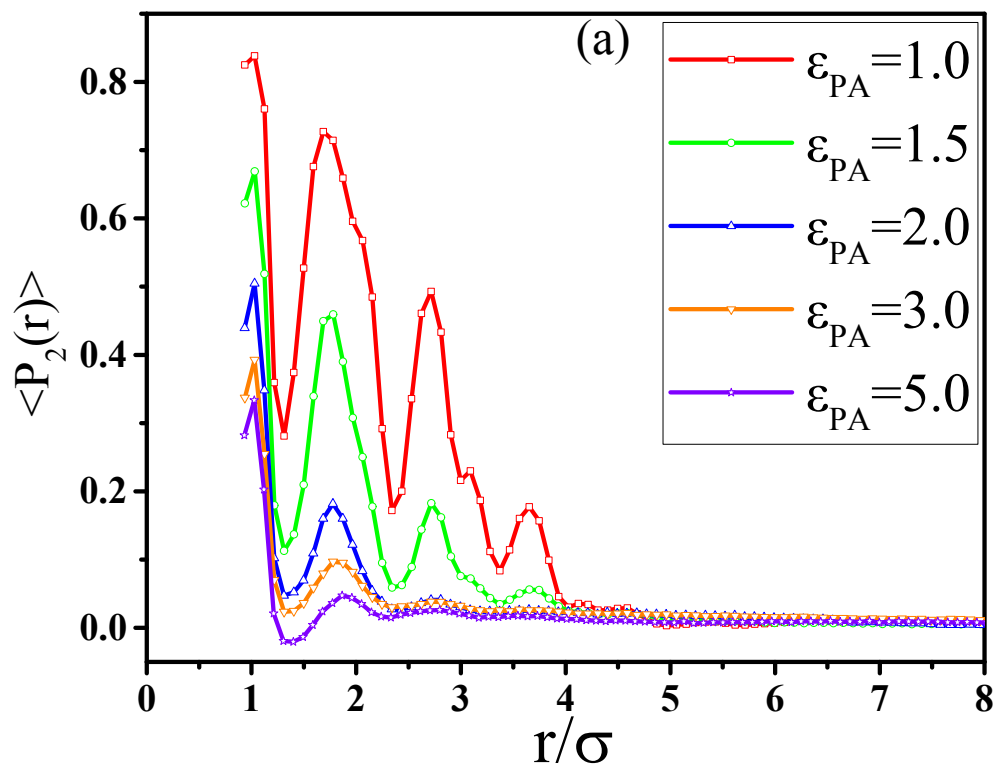

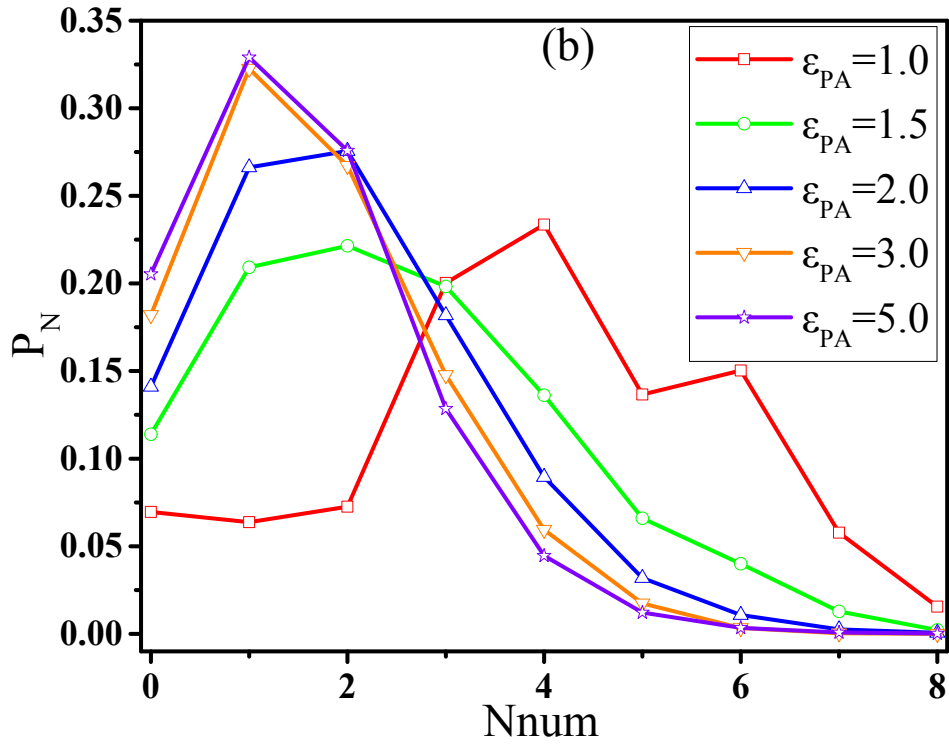

Fig. S5(a) The local order structure  $\langle P_2(r) \rangle$  of the nanorod (NR) aggregation and (b) the probability distribution ( $P_N$ ) of the nearest neighbor NRs surrounding one NR at a separation closer than  $1.5\sigma$  (Nnum) for different interaction  $\epsilon_{pA}$  between polymer and A beads. ( $T^*=1.0$ ,  $\varphi=4.0\%$ ,  $\dot{\gamma}=0.0$ )

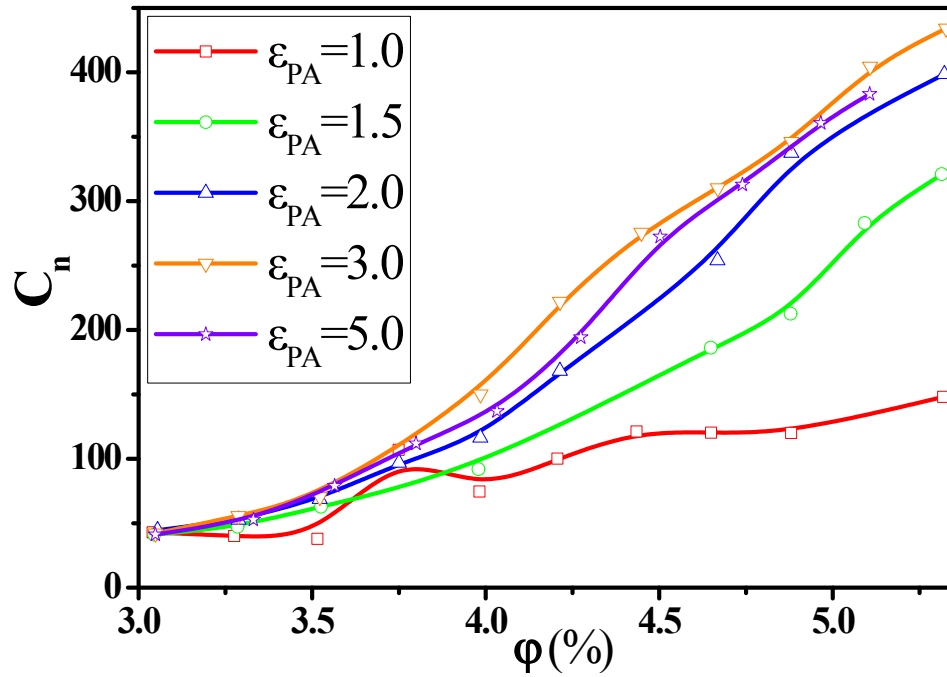

Fig. S6 Change of the main cluster size  $C_n$  as a function of the nanorod (NR) volume fraction  $\varphi$  for different interaction  $\epsilon_{pA}$  between polymer and A beads. ( $T^*=1.0$ ,  $\dot{\gamma}=0.0$ )

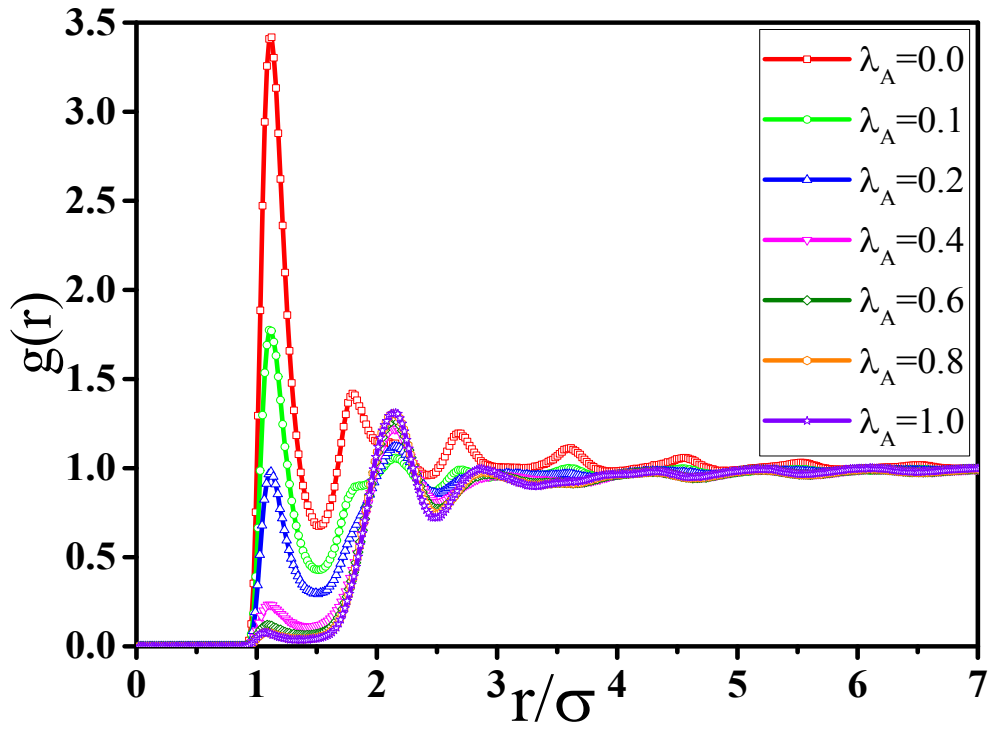

Fig. S7 RDF of nanorods (NR) for different NR functionalization degree  $\lambda_A$ . ( $T^*=1.0$ ,  $\varphi=4.0\%$ ,  $\dot{\gamma}=0.1$ )

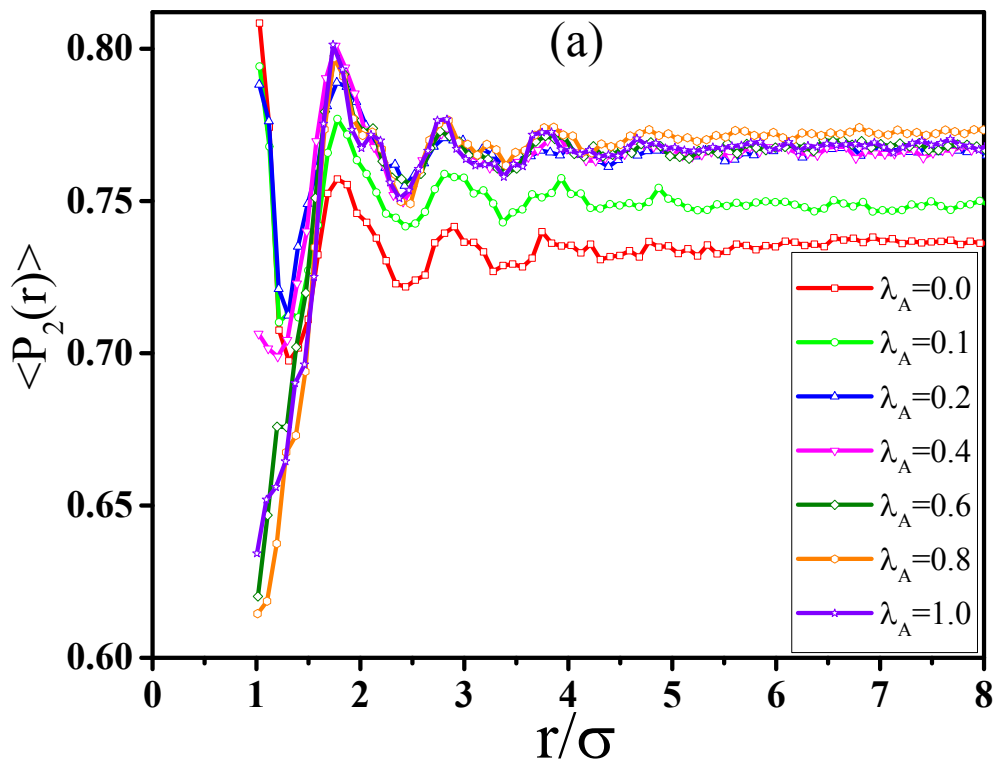

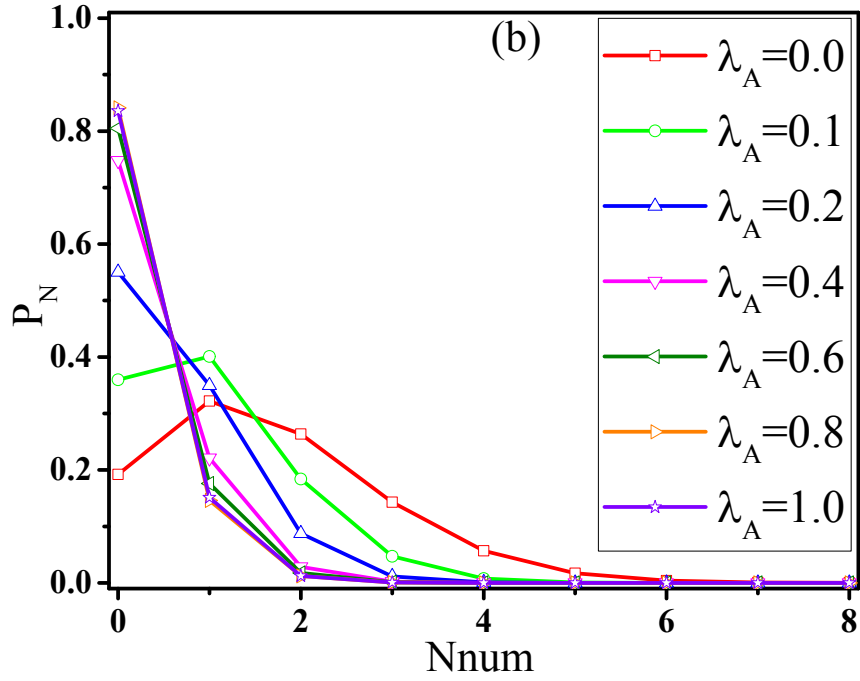

Fig. S8(a) The local order structure  $\langle P_2(r) \rangle$  of the nanorod (NR) aggregation and (b) the probability distribution ( $P_N$ ) of the nearest neighbor NRs surrounding one NR at a separation closer than  $1.5\sigma$  (Nnum) for different NR functionalization degree ( $\lambda_A$ ). ( $T^* = 1.0$ ,  $\varphi = 4.0\%$ ,  $\dot{\gamma} = 0.1$ )

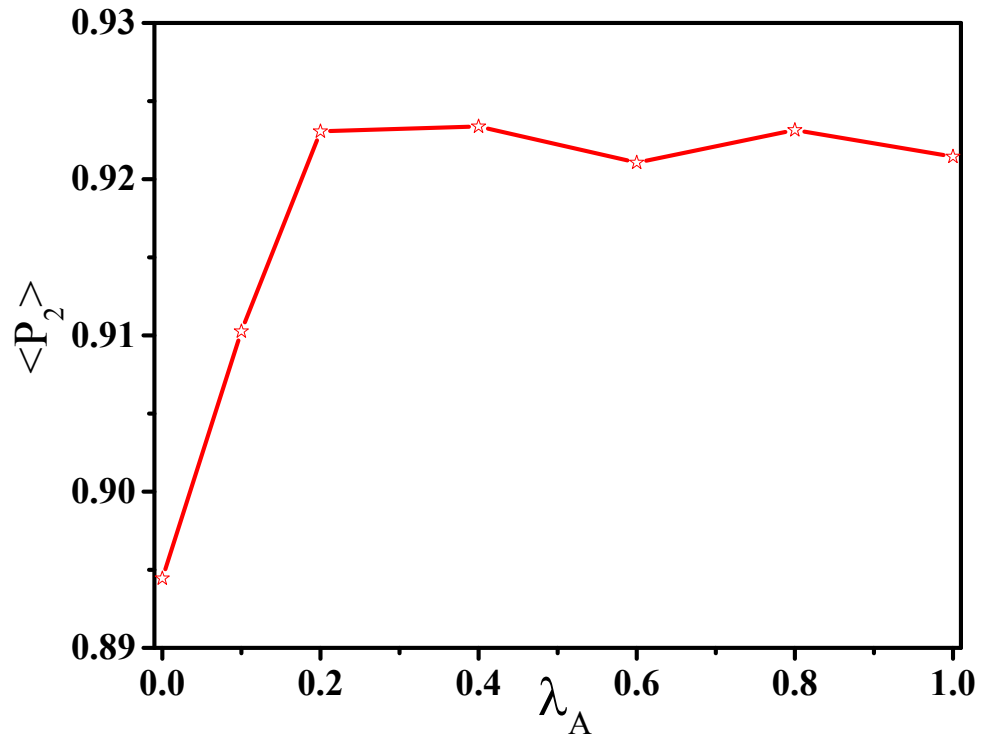

Fig. S9 The orientation degree  $\langle P_2 \rangle$  of the nanorods (NR) with respect to the NR functionalization degree ( $\lambda_A$ ). ( $T^* = 1.0$ ,  $\varphi = 4.0\%$ ,  $\dot{\gamma} = 0.1$ )

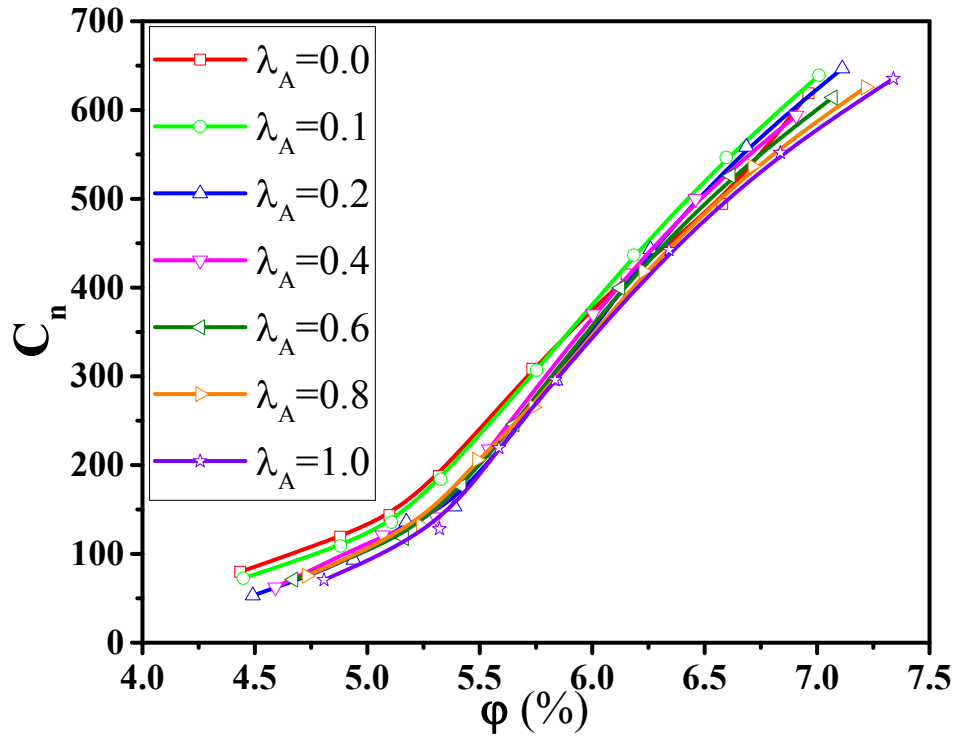

Fig. S10 Change of the main cluster size  $C_n$  as a function of the nanorod (NR) volume fraction  $\phi$  for different NR functionalization degree ( $\lambda_A$ ). ( $T^*=1.0, \dot{\gamma}=0.1$ )

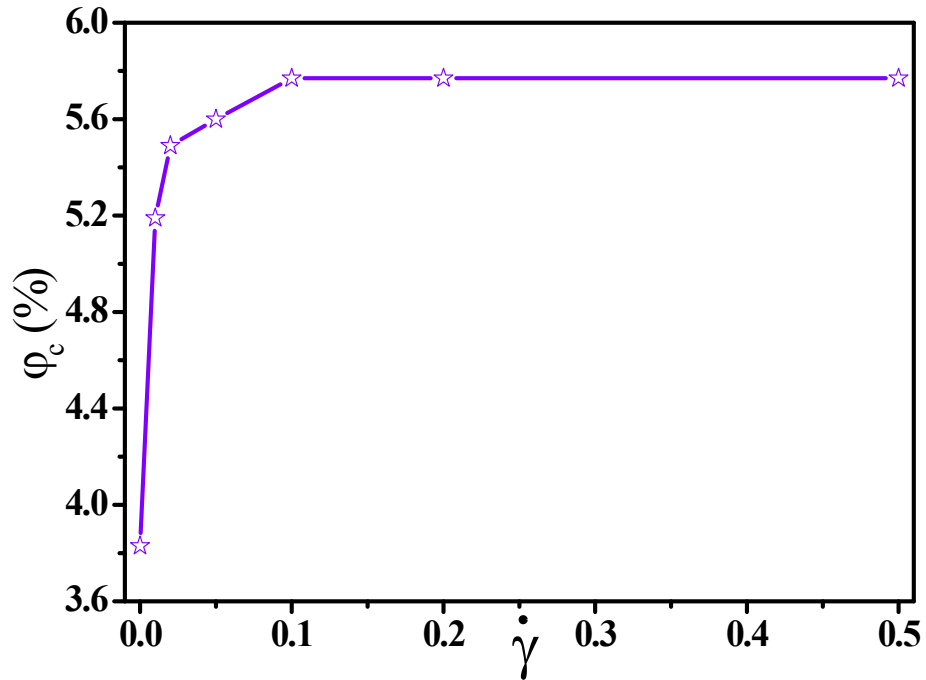

Fig. 11 The percolation threshold  $\phi_c$  with respect to the shear rate  $\dot{\gamma}$ . ( $T^*=1.0, \lambda_A=0.1$ )



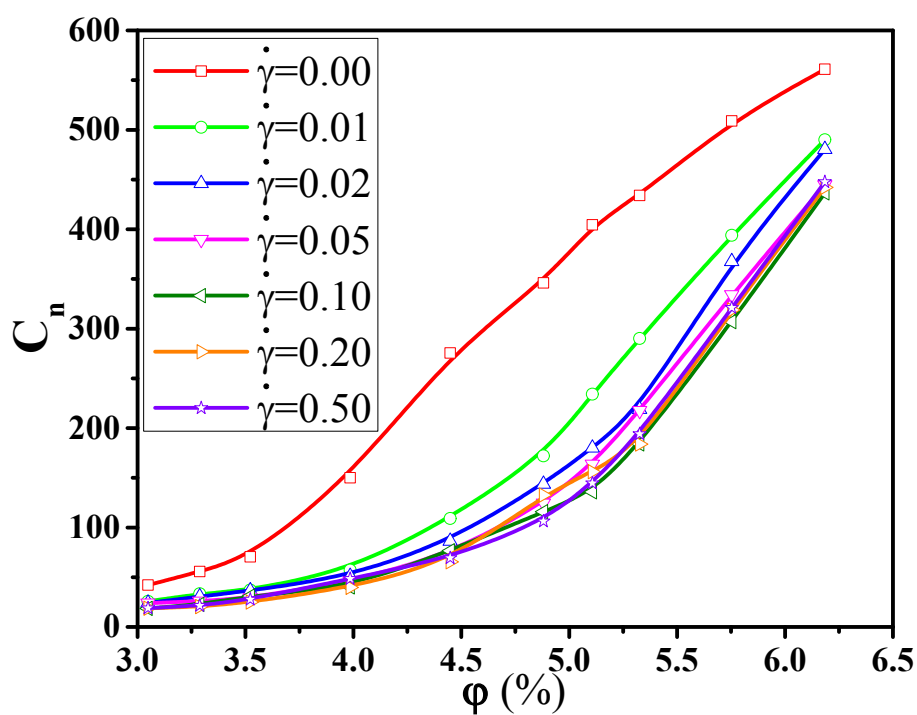

Fig. S12 Change of the main cluster size  $C_n$  as a function of the nanorod volume fraction  $\phi$  for different shear rate ( $\dot{\gamma}$ ). ( $T^*=1.0$ ,  $\lambda_A=0.1$ )

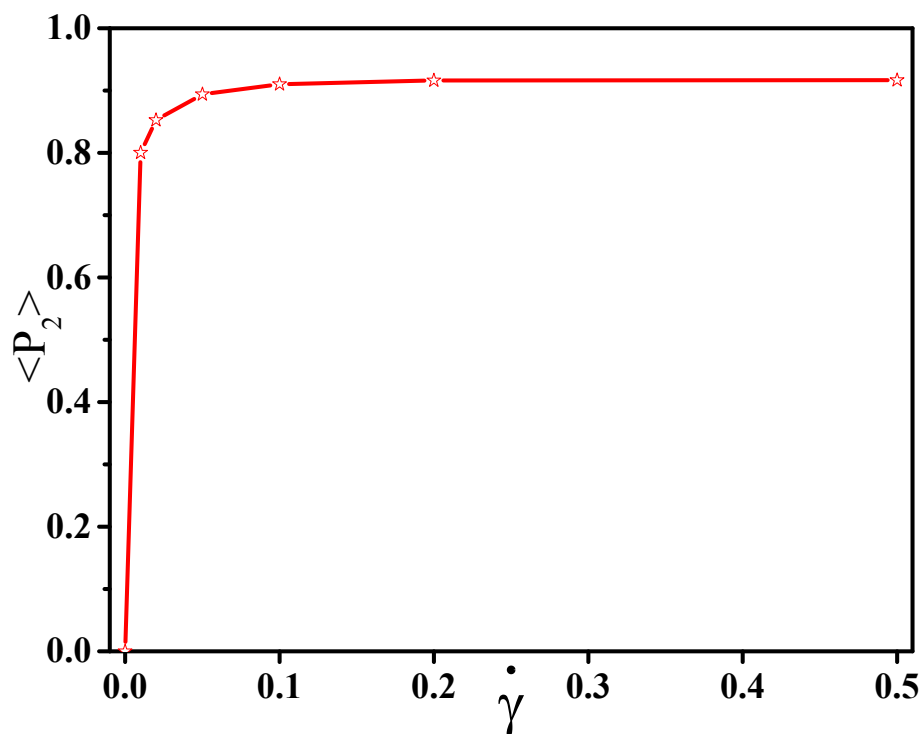

Fig. S13 the NR orientation  $\langle P_2 \rangle$  with respect to the shear rate  $\dot{\gamma}$ . ( $T^*=1.0$ ,  $\phi=4.0\%$ ,  $\lambda_A=0.1$ )

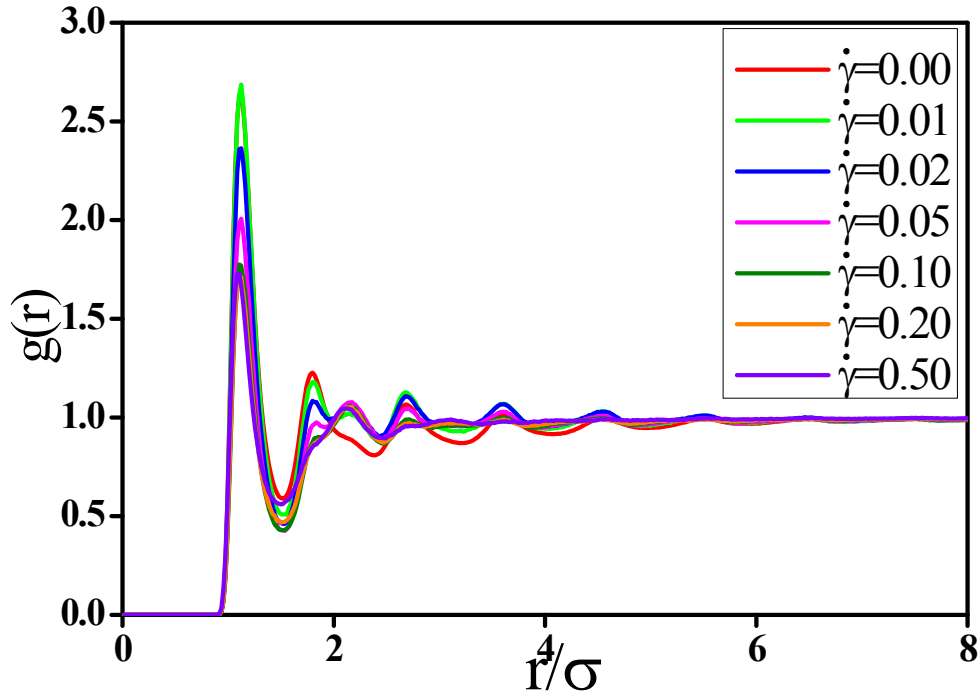

Fig. S14 RDF of nanorods with respect to the shear rate  $\dot{\gamma}$ . ( $T^* = 1.0$ ,  $\varphi = 4.0\%$ ,  $\lambda_A = 0.1$ )

Table S1 Nonbonded interaction parameters used in this work.

| Interaction types                | $\varepsilon_{ij}^a$ ( $\varepsilon$ ) | $r_{cutoff}^b$ ( $\sigma$ ) |
|----------------------------------|----------------------------------------|-----------------------------|
| PB <sup>c</sup> -PB <sup>c</sup> | 1.0                                    | $2 \times 2^{1/6}$          |
| PB <sup>c</sup> -NR <sup>u</sup> | 1.0                                    | 2.5                         |
| PB <sup>c</sup> -NR <sup>f</sup> | 1.0-5.0                                | 2.5                         |
| NR <sup>u</sup> -NR <sup>u</sup> | 1.0                                    | 2.5                         |
| NR <sup>u</sup> -NR <sup>f</sup> | 1.0                                    | 2.5                         |
| NR <sup>f</sup> -NR <sup>f</sup> | 1.0                                    | 2.5                         |

<sup>a</sup>  $\varepsilon_{ij}$  the energy parameters between interacting sites i and j.

<sup>b</sup>  $r_{cutoff}$  is the cut-off distance.

<sup>c</sup>PB is the bead on polymer chain.

<sup>u</sup>NR is the unfunctionalized bead on nanorod.

<sup>f</sup>NR is the functionalized bead on nanorod.
